# Supplementary material for: Electrochemical synthesis and structural characterization of Co(II), Ni(II) and Cu(II) complexes of N,N-bis(4,5-dimethyl-2-hydroxybenzyl)-N-(2-pyridylmethyl)amine
Source: Royal Society of Chemistry journal article supplement (doi:10.1039/b907539a), 2009-01-01
Supplement: b907539a.pdf [file b907539a.pdf]

## Data presentation and statistical analysis

Unless otherwise specified, results shown in the text, table and figure are expressed as means  $\pm$  S.E.M. for five experiments. Significant differences between two means ( $P < 0.05$ ) were determined by one-way analysis of variance (ANOVA) followed by the Dunnett's *post hoc* test. Catalase-like activity was expressed as nanomoles of  $\text{H}_2\text{O}_2$  transformed per min in the reaction mixture. For comparative purposes, a Relative Catalase Activity (RCA) was calculated for each compound as the concentration that causes equal  $\text{H}_2\text{O}_2$  transformation to 0.5 U/mL of commercial catalase from bovine liver (see drugs and chemicals) under the same assay conditions. This RCA value was estimated from the linear plot of “*tested compound concentration (X axis) versus catalase activity (Y axis)*”.

In addition, the corresponding values of  $K_m$  and  $V_{\max}$  (maximum reaction velocity) were estimated by least-squares linear regression, using the program Origin<sup>TM</sup> 5.0 (Microcal Software, Inc., Northampton, MA, USA), of the corresponding Lineweaver–Burk plots with  $X = 1/\text{H}_2\text{O}_2$  molar concentration and  $Y = 1/\text{reaction velocity (V)}$ . The Y-intercept and the slope of this regression have a value of  $1/V_{\max}$  and  $K_m/V_{\max}$ , respectively.

On the other hand, the  $K_{\text{cat}}$  values [i.e., the number of molecules of substrate ( $\text{H}_2\text{O}_2$ ) transformed to the reaction product per unit of time in the presence of one molecule of the compounds tested or catalase and when they are saturated with high concentrations of  $\text{H}_2\text{O}_2$ ] were estimated from the formula:  $K_{\text{cat}} = V_{\max}/\text{catalyst}$  or catalase total concentration.
